# Supplementary material
Source: publisher site journal article supplement (http://zookeys.pensoft.net/article/8981/download/suppl/31/)
Supplement: Supplementary file

Mitochondrial genotyping of an endangered bitterling *Acheilognathus typus*

Kenji Saitoh, Kentaro Shindo, Yasufumi Fujimoto, Kiyotaka Takahashi, Tetsuo Shimada

Supplementary Data

Table S1. Normalized haplotype composition of localities.

| # \ Haplotype | Hap1 | Hap2 | Hap3 | Hap4 | Hap5 | Hap6 | Hap7 | Hap8 |
|---------------|------|------|------|------|------|------|------|------|
| 1             | 30   |      |      |      |      |      |      |      |
| 2             | 30   |      |      |      |      |      |      |      |
| 3             | 27   |      |      | 3    |      |      |      |      |
| 4-1           | 29   |      |      |      |      | 1    |      |      |
| 4-2           | 28   |      |      |      |      |      | 2    |      |
| 5             | 30   |      |      |      |      |      |      |      |
| 6-1           | 16   | 6    | 8    |      |      |      |      |      |
| 6-2           | 7    | 20   | 3    |      |      |      |      |      |
| 6-3           | 10   | 20   |      |      |      |      |      |      |
| 6-4           | 30   |      |      |      |      |      |      |      |
| 6-5           | 15   |      |      | 15   |      |      |      |      |
| 6-6           | 17   |      |      | 13   |      |      |      |      |
| 7             | 17   |      |      |      | 13   |      |      |      |
| 8             | 15   |      |      | 15   |      |      |      |      |
| 9             | 7    |      |      | 23   |      |      |      |      |
| 10            |      |      |      | 30   |      |      |      |      |
| 11            | 30   |      |      |      |      |      |      |      |
| 12            |      |      |      |      |      |      |      | 30   |
| overall       | 338  | 46   | 11   | 99   | 13   | 1    | 2    | 30   |

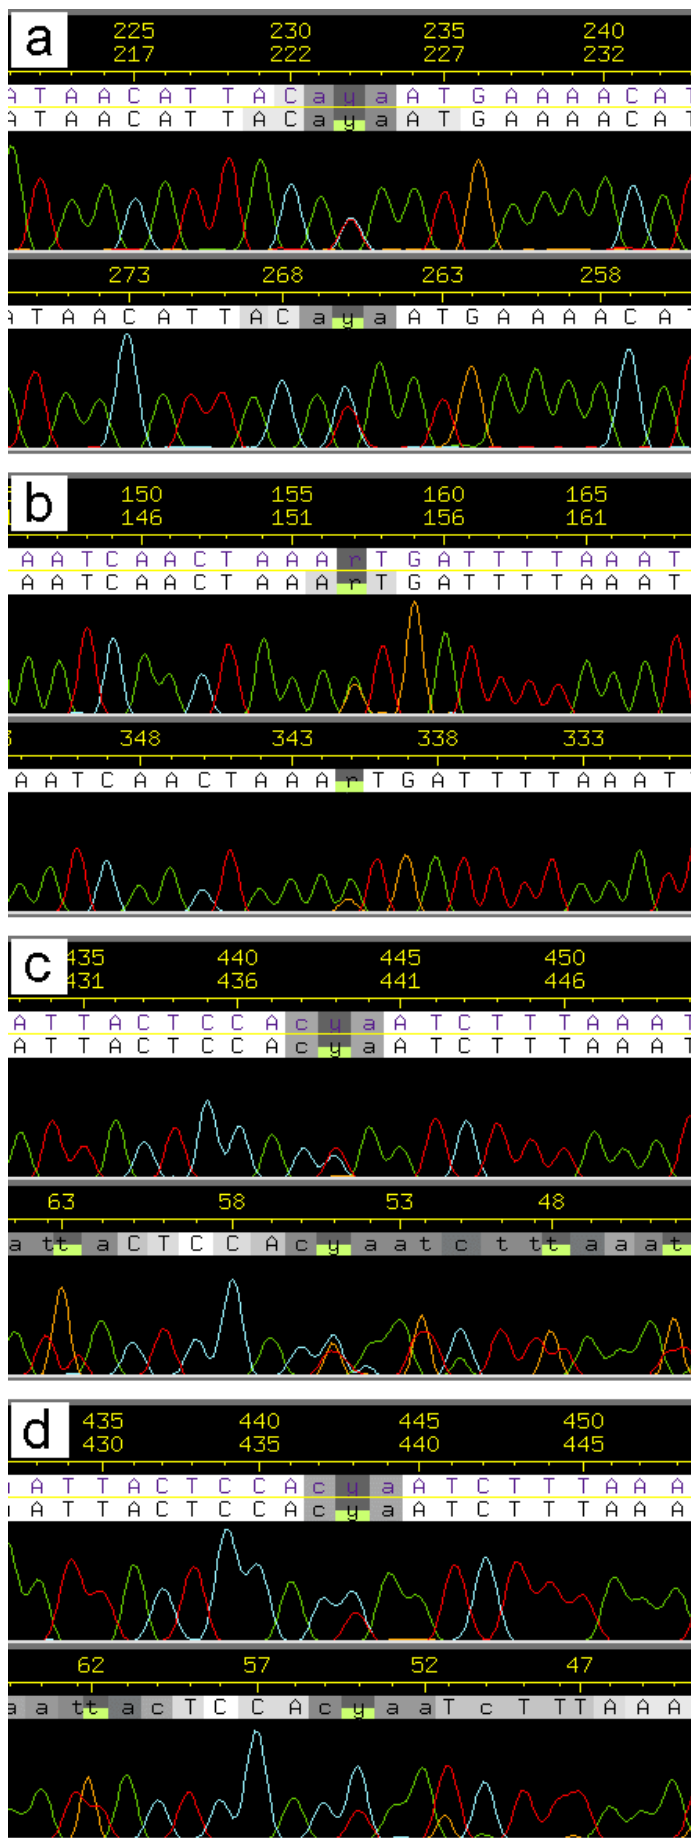

Figure S1. Sequence traces of both directions with double-peaked sites. An individual collected at locality #4-2 (a) showed C/T at 232th site, and this site was phased to C. A/G at 157th (b) and C/T (c) at 443th sites of an individual from locality #6-2 were phased to A and T respectively. C/T at 443th site of another individual from locality #6-2 was phased to T. C blobs near the start site of reverse reads (exhibited as G blobs on reverse complement traces on lower panels of c and d) were ignored.
